# Supplementary material for: Shell and ligand-dependent blinking of CdSe-based core/shell nanocrystals
Source: Royal Society of Chemistry journal article supplement (doi:10.1039/b924917f), 2010-01-01
Supplement: b924917f.pdf [file b924917f.pdf]

## Electronic Supplementary Information

### Shell and Ligand-Dependent Blinking of CdSe-Based Core/Shell

#### Nanocrystals

Bonghwan Chon,<sup>a</sup> Sung Jun Lim,<sup>a</sup> Wonjung Kim,<sup>a</sup> Jongcheol Seo,<sup>a</sup> Hyeonggon Kang,<sup>b</sup> Taiha Joo,<sup>a</sup> Jeeseong Hwang<sup>b</sup> and Seung Koo Shin<sup>\*a</sup>

<sup>a</sup> *Bio-Nanotechnology Center, Department of Chemistry, Pohang University of Science and Technology, San31 Hyoja-dong Nam-gu, Pohang, Kyungbuk 790-784, Korea. Fax: +82 54 279 3399; Tel: +82 54 279 2123; E-mail: skshin@postech.ac.kr*

<sup>b</sup> *National Institute of Standards and Technology, Physics Laboratory, Optical Technology Division, 100 Bureau Drive, Gaithersburg, MD 20899, USA Fax: +1 301 975 4580; Tel: +1 307 975 6991*

\*To whom all correspondence should be addressed.

#### Figure Caption

**Figure S1.** Powder X-ray diffraction of CdSe/ZnS(6ML), CdSe/ZnSe(2ML)/ZnS(4ML) and CdSe/CdS(2ML)/ZnS(4ML) nanocrystals. The shell thickness is denoted in parenthesis in units of monolayer (ML). Vertical lines represent the diffraction patterns for bulk ZB compounds.

**Figure S2.** (a) The on-time duration following the  $N$ th off-period for CdSe/ZnS(6ML), CdSe/ZnSe(2ML)/ZnS(4ML) and CdSe/CdS(2ML)/ZnS(4ML) organic-soluble nanocrystals; (b) the off-time duration following the  $N$ th on-period.

**Figure S3.** (a) Blinking time trace (0–6 min, 4 ms bin) and intensity histogram of a water-soluble CdSe/ZnSe/ZnS nanocrystal. The on/off threshold was varied from two to seven times the standard deviation ( $\sigma$ ) of average dark count. (b) On- and (c) off-time probability distributions in log-log scale at various thresholds. Each probability distribution was fit to the power law to extract  $\alpha_{\text{on}}$  and  $\alpha_{\text{off}}$ . Threshold dependence of (d) on- and (e) off-time exponents: The power-law exponents obtained from threshold of 3–6 $\sigma$  are comparable within errors.

**Figure S4.** (a) Blinking time trace (0–6 min, 4 ms bin) and intensity histogram of an organic-soluble CdSe/CdS/ZnS nanocrystal with increasing integration bin time; 4 ms (green), 8 ms (blue), 16 ms (red) and 32 ms (black). (b) Blinking time trace expanded between 165 and 177 s. The on/off threshold of  $3\sigma$  is denoted by dotted line.

**Figure S5.** On- and off-probability distributions of an organic-soluble CdSe/CdS/ZnS nanocrystal with increasing integration bin time; 4 ms (green), 8 ms (blue), 16 ms (red) and 32 ms (black). (a) On-time and (b) off-time on log–log scales; (c) on-time and (d) off-time in log–linear scales. The power-law exponents are assigned to the data in log–log plots. Each line shown in semi-log plots represents the three-component exponential fit to the data. A single exponential does not fit the data.

### List of Table

**Table S1.** Mean and error (95% confidence limit) of the power exponents ( $\alpha_{\text{on}}$ ,  $\alpha_{\text{off}}$ ) for organic and water-soluble nanocrystals,  $N$  is the number of nanocrystals.

**Table S2.** Previously reported power-law exponents of CdSe-based nanocrystals under various substrates and surface passivation conditions.

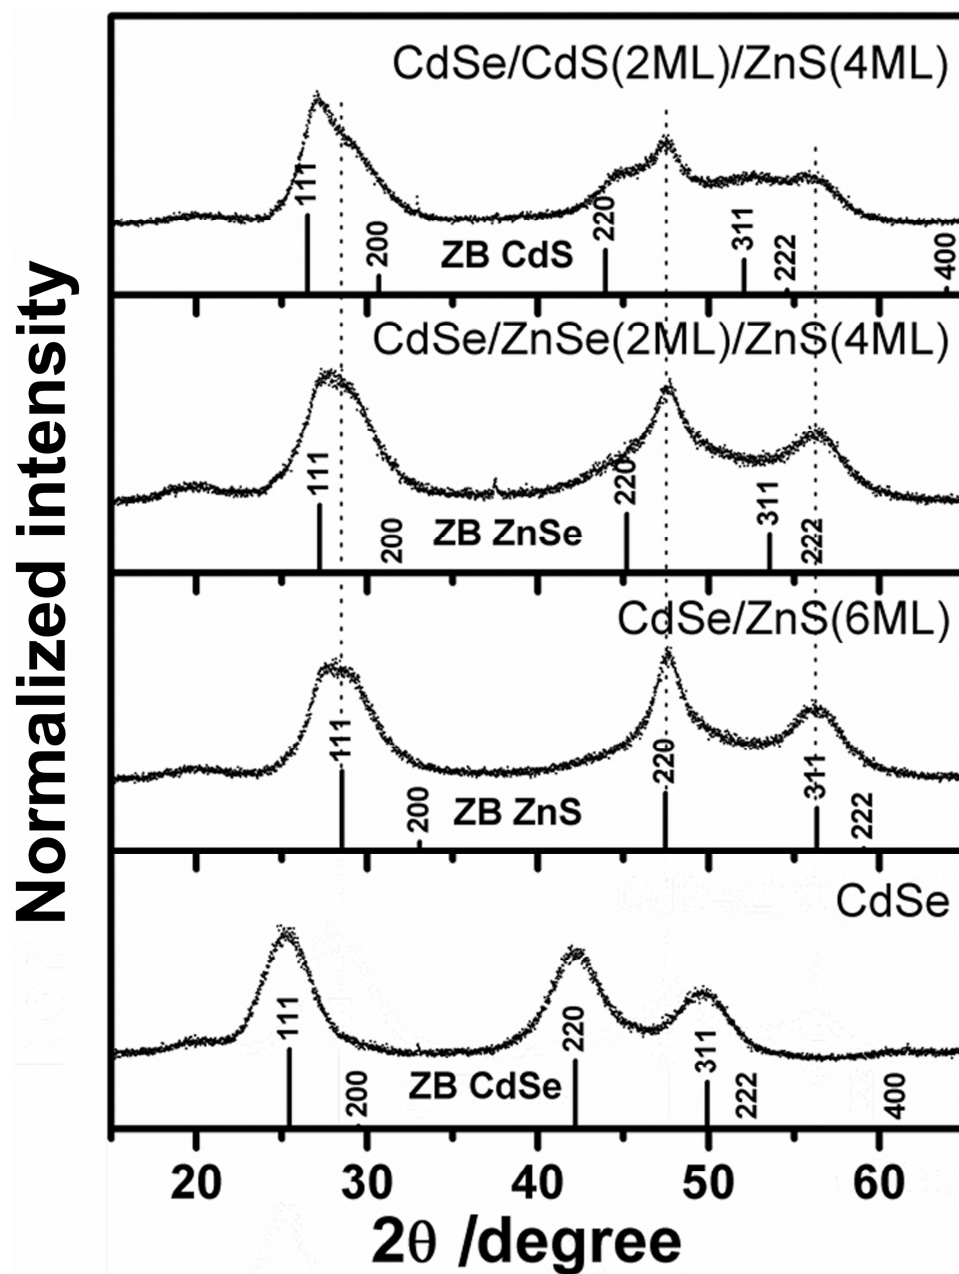

Figure S1

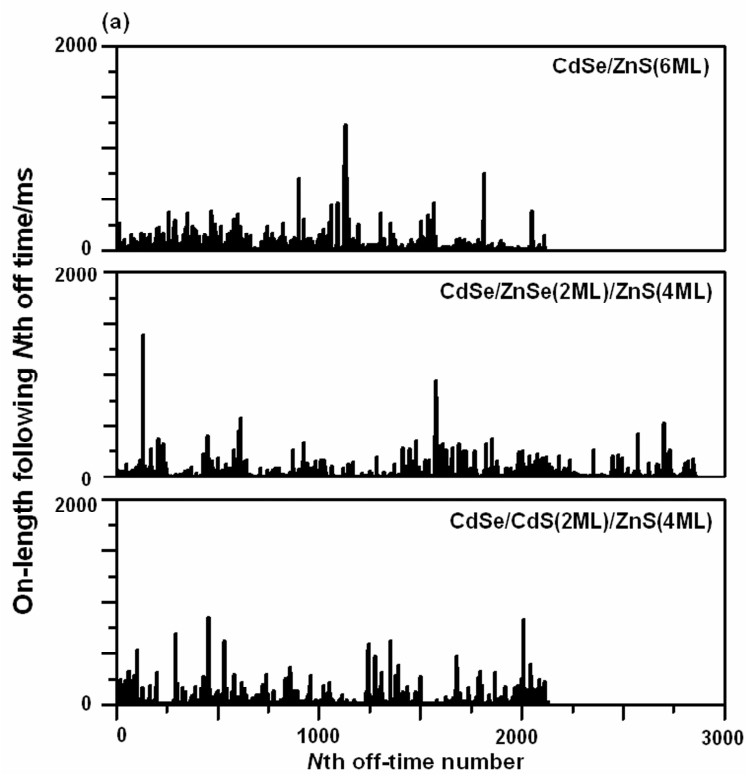

Figure S2a

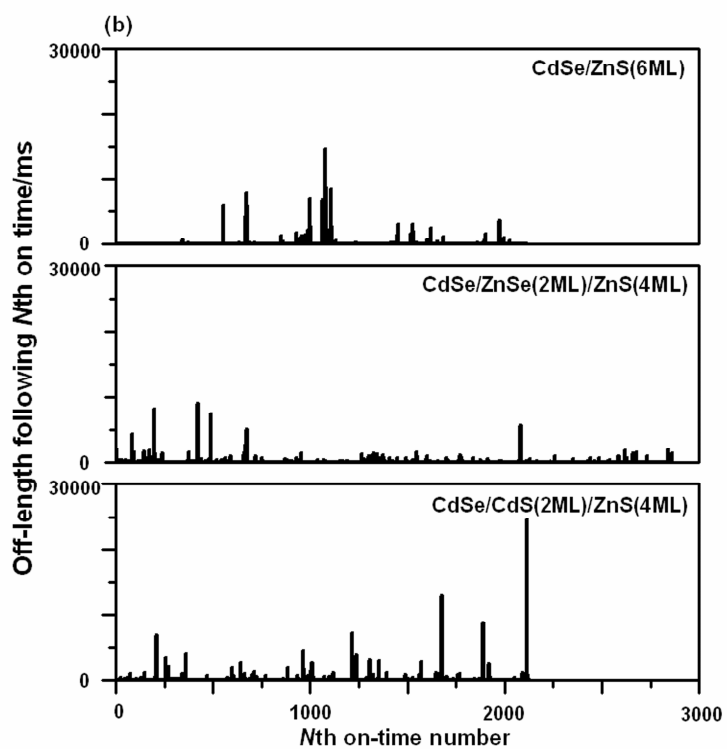

Figure S2b

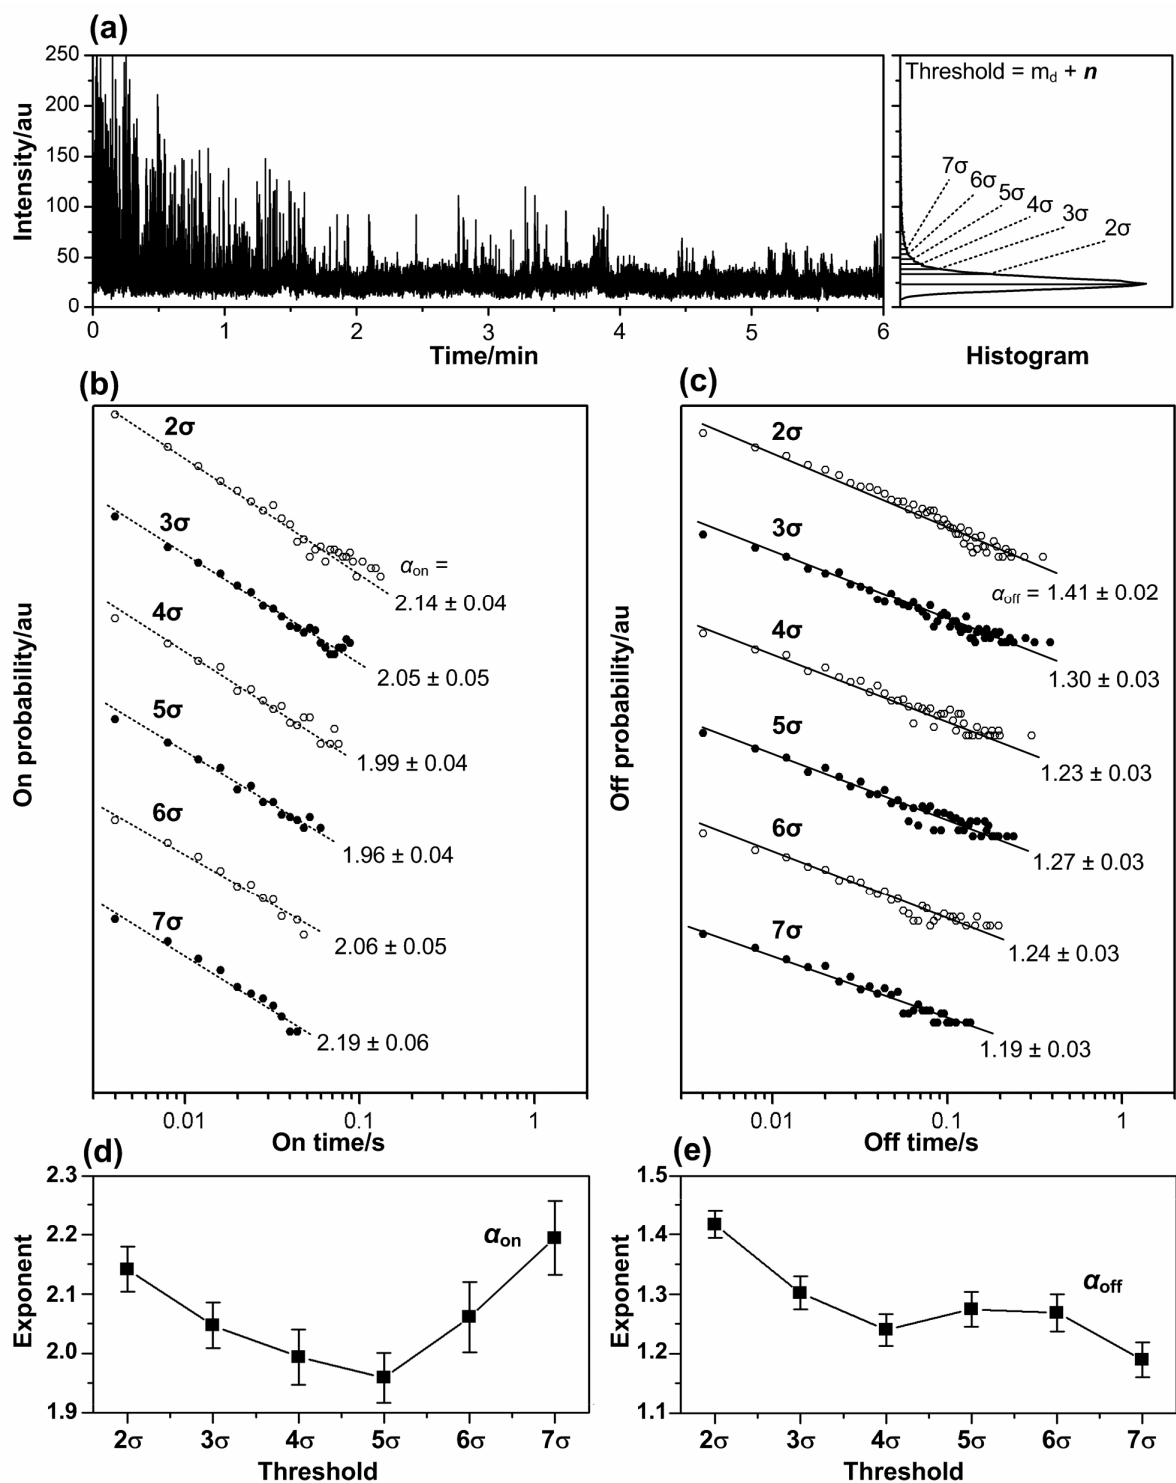

Figure S3

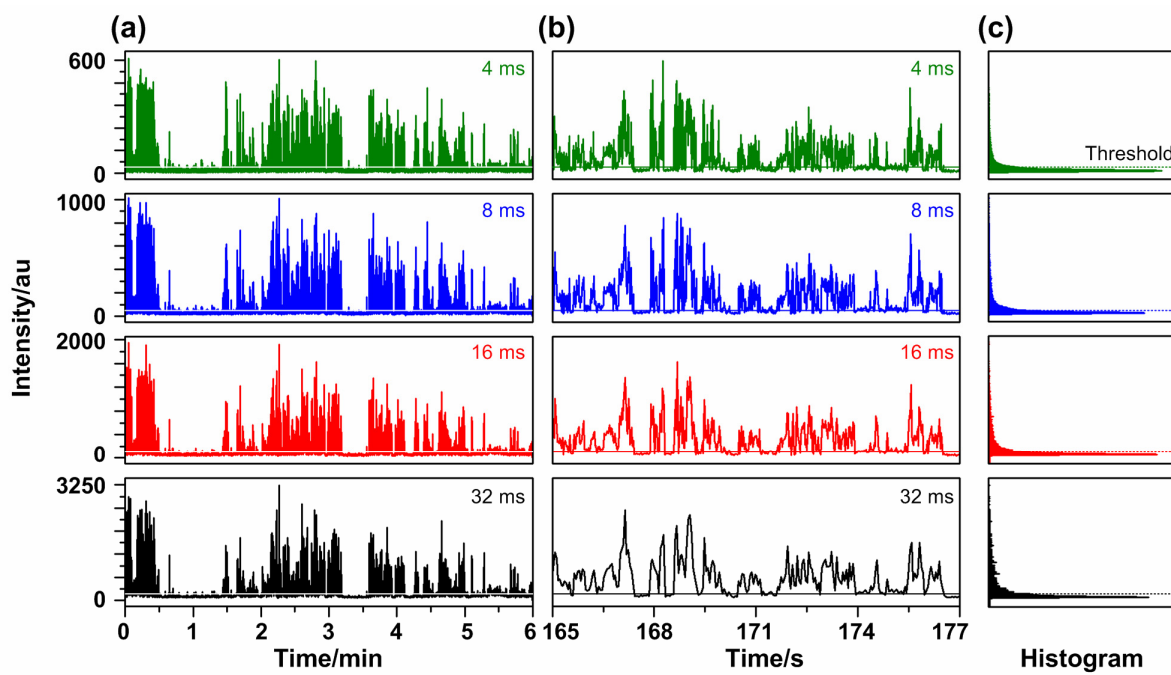

Figure S4

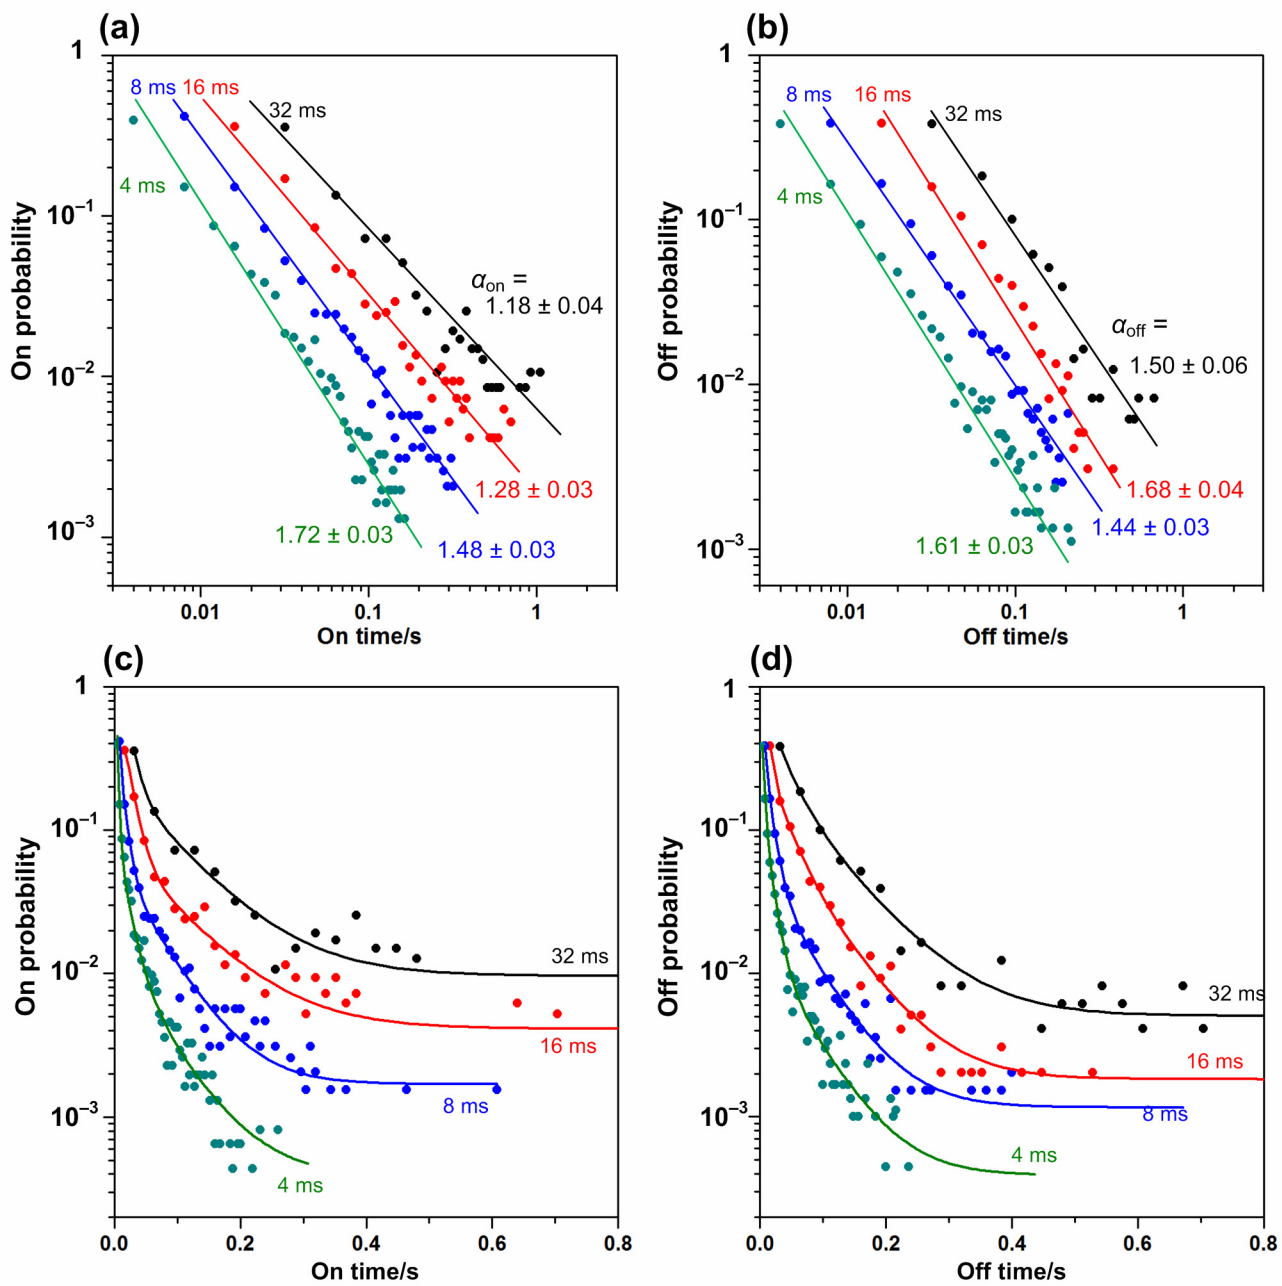

Figure S5

**Table S1.** Mean and error (95% confidence limit) of the power exponents ( $\alpha_{\text{on}}$ ,  $\alpha_{\text{off}}$ ) for organic and water-soluble nanocrystals,  $N$  is the number of nanocrystals

| core/shell nanocrystals | organic-soluble <sup>a</sup> |                                 |                                  | water-soluble <sup>b</sup> |                                 |                                  |
|-------------------------|------------------------------|---------------------------------|----------------------------------|----------------------------|---------------------------------|----------------------------------|
|                         | $N$                          | $\alpha_{\text{on}} \pm \sigma$ | $\alpha_{\text{off}} \pm \sigma$ | $N$                        | $\alpha_{\text{on}} \pm \sigma$ | $\alpha_{\text{off}} \pm \sigma$ |
| CdSe/ZnS(6ML)           | 12                           | $1.86 \pm 0.13$                 | $1.38 \pm 0.10$                  | 12                         | $2.17 \pm 0.11$                 | $1.33 \pm 0.08$                  |
| CdSe/ZnSe(2ML)/ZnS(4ML) | 15                           | $1.75 \pm 0.12$                 | $1.36 \pm 0.07$                  | 7                          | $2.11 \pm 0.13$                 | $1.25 \pm 0.06$                  |
| CdSe/CdS(2ML)/ZnS(4ML)  | 33                           | $1.53 \pm 0.08$                 | $1.55 \pm 0.03$                  | 15                         | $1.85 \pm 0.14$                 | $1.37 \pm 0.06$                  |

<sup>a</sup> Stearate-covered nanocrystals in chloroform.

<sup>b</sup> MPA (3-mercaptopropionic acid)-capped nanocrystals in water.

**Table S2.** Previously reported power-law exponents of CdSe-based nanocrystals under various substrates and surface passivation conditions

| nanocrystal | organic-soluble      |                       | water-soluble        |                       | substrate               | ref.         |
|-------------|----------------------|-----------------------|----------------------|-----------------------|-------------------------|--------------|
|             | $\alpha_{\text{on}}$ | $\alpha_{\text{off}}$ | $\alpha_{\text{on}}$ | $\alpha_{\text{off}}$ |                         |              |
| CdSe        | 1.70                 | 1.29                  |                      |                       | glass slide             | 1            |
|             | 1.54 <sup>a</sup>    | 1.35 <sup>a</sup>     |                      |                       | glass slide             | 1            |
| CdSe/CdS    | 1.42                 | 1.54                  |                      |                       | polymer film            | 1            |
| CdSe/ZnS    |                      | 1.37–1.79             |                      |                       | glass slide             | 2            |
|             | 1.73                 | 1.38                  | 2.29 <sup>b</sup>    | 1.39 <sup>b</sup>     | glass slide             | 3            |
|             |                      |                       | 2.27 <sup>c</sup>    | 1.64 <sup>c</sup>     | glass slide             | 3            |
|             |                      |                       | 1.48 <sup>d</sup>    | 1.64 <sup>d</sup>     | glass slide             | 3            |
|             |                      |                       | 1.71 <sup>e</sup>    | 1.64 <sup>e</sup>     | glass slide             | 4            |
|             |                      |                       | 2.04 <sup>e</sup>    | 1.57 <sup>e</sup>     | gel                     | 4            |
|             |                      | 1.46–1.77             |                      |                       | polymer film            | 5            |
|             |                      | 1.71                  | 1.63                 | 2.16 <sup>f</sup>     | 1.72 <sup>f</sup>       | polymer film |
|             |                      |                       | 2.25 <sup>g</sup>    | 1.66 <sup>g</sup>     | polymer film            | 6            |
|             | 1.61                 | 1.74                  |                      |                       | fused silica cover slip | 7            |

<sup>a</sup> octylamine-covered

<sup>b</sup> carboxy-functionalized

<sup>c</sup> amine-functionalized

<sup>d</sup> mercaptoundecanoic acid-capped

<sup>e</sup> strepavidin-conjugated

<sup>f</sup> AET (aminoethanethiol)-capped

<sup>g</sup> MPA (3-mercaptopropionic acid)-capped



## REFERENCES

1. D. E. Gómez, J. van Embden, J. Jasieniak, T. A. Smith and P. Mulvaney, *Small*, 2006, **2**, 204–208.
2. M. Kuno, D. P. Fromm, H. F. Hamann, A. Gallagher and D. J. Nesbitt, *J. Chem. Phys.*, 2001, **115**, 1028–1040.
3. J. R. Krogmeier, H. Kang, M. L. Clarke, P. Yim and J. Hwang, *Opt. Commun.*, 2008, **281**, 1781–1788.
4. J. Yao, D. R. Larson, H. D. Vishwasrao, W. R. Zipfel and W. W. Webb, *Proc. Natl. Acad. Sci. USA*, 2005, **102**, 14284–14289.
5. A. Issac, C. von Borczyskowski and F. Cichos, *Phys. Rev. B: Condens. Matter Mater. Phys.*, 2005, **71**, 161302(R).
6. Y. Kim, N. W. Song, H. Yu, D. W. Moon, S. J. Lim, W. Kim, H.-J. Yoon and S. K. Shin, *Phys. Chem. Chem. Phys.*, 2009, **11**, 3497–3502.
7. M. Kuno, D. P. Fromm, S. T. Johnson, A. Gallagher and D. J. Nesbitt, *Phys. Rev. B: Condens. Matter Mater. Phys.*, 2003, **67**, 125304.
